# Supplementary material for: Plato's Cave Algorithm: Inferring Functional Signaling Networks from Early Gene Expression Shadows
Source: PLoS Comput Biol. 2010 Jun 24;6(6):e1000828. doi: 10.1371/journal.pcbi.1000828 (PMC2891706; doi:10.1371/journal.pcbi.1000828)
Supplement: Dataset S1 — Gene expression results of GnRH-induced early genes in LβT2 cells. Five experiments were performed, measuring 18 to 24 early genes. The data set contains the gene expression values with GnRH treatment, and with a combination treratment of GnRH and an additional chemical inhibitior, as well as the standard deviation of the measurements. (0.11 MB XLS) [file pcbi.1000828.s001.xls]

## Sheet: Ex#1
Mean copy number in arbitrary units, assuming a constant ratio between each gene and rgs11
	cfos	cjun	egr1	egr2	fosB	gem	gly96	klf4	lrg21	mkp1	n10	per1	pip92	rgs2	tis11	tsc22
GnRH	522.305	18.9988	3.99755	82.4315	90.007	104.724	5.31763	10.8678	70.7894	64.713	10.2037	1.29457	3.21299	26.1622	195.209	627.698
PD	378.709	11.9507	7.49013	40.2126	50.5002	104.442	4.42451	9.72255	45.8281	59.0062	11.7126	2.00004	3.77791	26.327	144.029	680.59
SP	527.594	3.40178	4.52858	45.0803	64.0936	163.672	4.17501	25.5055	21.8735	55.322	10.8084	1.34956	2.0438	48.3248	124.725	724.841
BIMI	278.492	14.2549	7.0082	26.8741	13.9269	286.157	3.32817	8.22195	38.2548	32.3489	19.8642	1.31336	2.07334	12.1672	79.5305	435.184
PP2	301.925	11.367	6.07719	44.614	72.8555	190.114	3.97491	10.9887	52.8383	57.3754	8.08913	1.32231	2.28047	38.581	143.268	627.042
AG1478	482.943	11.8963	4.332	98.8515	119.816	126.61	6.90906	10.0864	77.3711	78.1471	9.98432	2.17873	5.90555	32.0638	242.711	814.131
KN62	408.144	10.3477	4.47541	79.8019	88.406	215.106	6.93105	11.5929	79.2642	69.9133	8.67489	2.31006	6.29699	22.7708	183.115	732.388
Mean difference in Ct values between gene and rgs11 (mean log activity)
	cfos	cjun	egr1	egr2	fosB	gem	gly96	klf4	lrg21	mkp1	n10	per1	pip92	rgs2	tis11	tsc22
GnRH	0.398226	-4.63794	-7.00958	-2.40851	-2.27857	-2.05626	-6.59653	-5.48713	-2.64642	-2.77604	-5.59188	-8.73354	-7.34889	-4.16267	-1.09735	0.682914
PD	-0.114731	-5.36013	-6.07272	-3.55628	-3.17078	-2.10688	-7.01074	-5.671	-3.30889	-2.93194	-5.58782	-8.20265	-7.34127	-4.17946	-1.57133	0.78159
SP	0.396647	-7.2624	-6.82666	-3.3459	-2.8009	-1.47754	-6.95084	-4.19308	-4.4286	-3.03404	-5.52329	-8.67914	-8.07072	-3.236	-1.80625	0.901256
BIMI	-0.556598	-5.07908	-6.15401	-4.11029	-5.12505	-0.543792	-7.29052	-5.91416	-3.57409	-3.8269	-4.63941	-8.7267	-8.0307	-5.33175	-2.469	0.126533
PP2	-0.433784	-5.42466	-6.37785	-3.35517	-2.62304	-1.16372	-7.06358	-5.47432	-3.08366	-2.95728	-5.95028	-8.81442	-8.0841	-3.58148	-1.59214	0.681396
AG1478	0.24882	-5.35556	-6.89102	-2.15441	-1.8579	-1.75883	-6.21277	-5.60217	-2.50691	-2.49739	-5.68843	-7.96179	-6.47492	-3.85629	-0.78119	1.0519
KN62	0.0235498	-5.56186	-6.83603	-2.46761	-2.33227	-0.954615	-6.22858	-5.39915	-2.47517	-2.66719	-5.88002	-7.85388	-6.33854	-4.38405	-1.21737	0.910394
Standard Deviation of mean log activity
	cfos	cjun	egr1	egr2	fosB	gem	gly96	klf4	lrg21	mkp1	n10	per1	pip92	rgs2	tis11	tsc22
GnRH	0.16819	0.117595	0.131267	0.153602	0.194102	0.25068	0.309629	0.111868	0.220058	0.146323	0.209777	0.224011	0.210245	0.238918	0.154446	0.0929264
PD	0.34065	0.283049	0.286143	0.481213	0.298962	0.472156	0.792591	0.256721	0.230411	0.277794	0.930544	0.720685	0.947798	0.394294	0.258159	0.313737
SP	0.296661	0.210139	0.205106	0.316127	0.244859	0.646374	0.210022	0.158445	0.179214	0.306673	0.337121	0.288998	0.397111	0.288566	0.360638	0.102133
BIMI	0.150022	0.16946	0.105039	0.112913	0.259963	0.34384	0.163726	0.148427	0.124878	0.0870571	0.542606	0.327683	0.321578	0.274522	0.213371	0.0787633
PP2	0.150772	0.188262	0.189155	0.274875	0.368344	0.330204	0.43322	0.166485	0.137528	0.121769	0.258196	0.722965	0.968571	0.313632	0.351414	0.0917084
AG1478	0.369323	0.190498	0.181578	0.318759	0.311658	0.186075	0.377162	0.136887	0.179083	0.225263	0.538621	0.371139	0.481726	0.268503	0.288695	0.318144
KN62	0.168059	0.119937	0.110971	0.256299	0.392403	0.208708	0.486933	0.235109	0.233042	0.238224	0.464888	0.253533	0.316774	0.327251	0.353273	0.192463

## Sheet: Ex#2
Mean copy number in arbitrary units, assuming a constant ratio between each gene and rgs11
	cfos	cjun	egr1	egr2	fosB	egr1	klf4	lrg21	mkp1	n10	per1	pip92	rgs2	tis11	tsc22
GnRH	254.935	11.1082	186.768	63.8179	91.271	12.8461	12.8353	54.6241	55.4721	0.0814543	1.82672	3.6383	11.6428	85.211	412.783
PD	193.571	10.0509	119.224	27.5939	49.7282	16.5753	14.4968	38.5979	46.9931	0.0790204	1.7541	3.08826	14.6641	55.6905	385.752
SP	312.918	4.18888	213.962	37.635	69.0104	17.7373	26.4872	22.749	51.6186	0.115267	2.1081	3.87872	27.5487	61.2997	425.161
BIMI	190.386	14.1199	148.919	23.6762	14.5601	7.90875	8.03621	30.1437	28.2607	0.0398858	1.04227	1.76337	7.62429	32.5948	299.853
PP2	225.148	12.9808	196.76	50.7857	81.6606	11.7497	13.0259	44.8327	52.7794	0.0793982	1.74073	3.0221	18.6738	68.9924	432.634
AG1478	242.695	11.7942	197.524	66.6096	98.0108	10.8412	6.736	60.7518	54.4113	0.0587078	0.78102	1.85812	11.8899	92.8778	421.538
KN62	226.959	12.2906	206.425	65.7616	93.5418	12.0232	12.1689	57.8944	48.5123	0.0812995	1.53833	2.95999	13.1078	79.6882	394.97
Mean difference in Ct values between gene and rgs11 (mean log activity)
	cfos	cjun	egr1	egr2	fosB	egr1	klf4	lrg21	mkp1	n10	per1	pip92	rgs2	tis11	tsc22
GnRH	-0.689395	-5.45801	-1.17002	-2.7943	-2.26984	-5.23647	-5.26343	-3.03599	-3.00981	-12.946	-8.24505	-7.18733	-5.38617	-2.35796	0.0471847
PD	-1.13429	-5.61728	-1.85761	-4.07056	-3.17415	-4.85884	-5.13274	-3.55957	-3.27788	-13.012	-8.40288	-7.70735	-5.04498	-3.02542	-0.0678526
SP	-0.376526	-6.96618	-0.957381	-3.59689	-2.6934	-4.75165	-4.15653	-4.36462	-3.11643	-12.4055	-8.13613	-7.23416	-4.07296	-2.86904	0.091567
BIMI	-1.13292	-5.08741	-1.50777	-4.30454	-5.05132	-6.01333	-5.99403	-3.9421	-4.03189	-14.0366	-9.15743	-8.32521	-6.0443	-3.81534	-0.440477
PP2	-0.880202	-5.21896	-1.08635	-3.14966	-2.41961	-5.37461	-5.28044	-3.33824	-3.08687	-12.9959	-8.37654	-7.51477	-4.67193	-2.67956	0.110535
AG1478	-0.764542	-5.36121	-1.07848	-2.73033	-2.14187	-5.49574	-6.24202	-2.87361	-3.03768	-13.4443	-9.5623	-8.20954	-5.35116	-2.22394	0.077583
KN62	-0.877104	-5.30194	-1.02406	-2.75516	-2.22956	-5.3586	-5.45905	-2.95591	-3.24745	-12.9423	-8.58761	-7.58051	-5.22189	-2.46574	-0.023273
Standard Deviation of mean log activity
	cfos	cjun	egr1	egr2	fosB	egr1	klf4	lrg21	mkp1	n10	per1	pip92	rgs2	tis11	tsc22
GnRH	0.126058	0.166402	0.207024	0.101279	0.29593	0.161384	0.349062	0.173859	0.138751	0.271224	0.424817	0.379809	0.162048	0.153895	0.04915
PD	0.329324	0.235141	0.254201	0.11996	0.10928	0.243457	0.56661	0.110818	0.273933	0.381537	0.700728	0.980023	0.243378	0.326704	0.210704
SP	0.107681	0.32781	0.146436	0.0916851	0.284734	0.215199	0.306325	0.12728	0.0922244	0.16496	0.734383	0.745669	0.120094	0.253547	0.0669679
BIMI	0.119599	0.0812903	0.137137	0.135772	0.208069	0.395239	0.428202	0.188467	0.076244	0.294559	0.634539	0.518042	0.278559	0.0865523	0.0909908
PP2	0.151487	0.142436	0.165041	0.195352	0.105442	0.187232	0.506476	0.187325	0.155187	0.335256	0.62095	0.562714	0.202009	0.155725	0.176538
AG1478	0.129124	0.0836638	0.139545	0.120087	0.103254	0.173544	0.331115	0.163978	0.115141	0.26954	0.52342	0.369785	0.122138	0.109291	0.0888244
KN62	0.233205	0.140777	0.25498	0.186582	0.269942	0.335574	0.731656	0.249854	0.386982	0.226418	0.686016	0.646208	0.306059	0.208052	0.122246

## Sheet: Ex#4
Mean copy number in arbitrary units, assuming a constant ratio between each gene and rgs11
	cfos	cjun	dexras	dusp8	egr1	egr2	egr3	fosB	fra1	GIF	junB	klf4	lrg21	mkp1	n10	nfil3	pip92	rgs2	sil	tis11
GnRH	320.366	27.9562	5.78828	42.7212	331.662	107.343	67.9005	155.431	15.9753	53.5399	3.6466	19.9284	101.877	74.9932	0.426739	7.2697	5.59977	22.469	16.534	156.71
PD	227.081	16.2282	13.7383	15.531	97.8814	22.9871	5.62096	54.8409	8.83118	54.8028	2.77001	22.9654	53.3893	78.6832	0.364191	8.07483	6.09494	23.9949	13.9208	135.513
SP	530.853	5.72175	3.31141	10.4686	412.523	72.6954	10.7566	128.743	4.23973	17.9154	0.664435	27.6778	41.2013	96.6381	0.468396	9.5358	2.7041	50.6216	10.9733	188.077
BIMI	402.467	25.8703	9.28967	15.99	233.143	43.0618	5.7981	32.7531	9.77724	120.254	1.60526	18.2869	56.9811	46.5542	0.28697	8.59881	4.12592	12.1562	15.7187	72.3436
PP2	233.084	19.4644	5.56172	20.3759	267.556	57.9857	11.5964	93.7965	7.87583	57.7356	2.16085	11.3533	61.4936	69.8796	0.53627	6.24497	5.05315	22.9661	9.46006	137.544
AG1478	240.903	20.749	20.5118	21.0722	268.524	83.677	19.9092	123.749	9.82873	295.884	1.62207	13.4607	77.8577	66.2342	0.452247	5.99284	2.76784	15.1304	44.3284	133.244
KN62	243.53	21.0833	4.12448	10.2402	307.754	105.12	8.1053	128.569	4.79184	50.2531	0.510911	12.5893	86.9582	63.5357	0.476285	2.5078	3.30187	14.5573	14.8907	140.125
Mean difference in Ct values between gene and rgs11 (mean log activity)
	cfos	cjun	dexras	dusp8	egr1	egr2	egr3	fosB	fra1	GIF	junB	klf4	lrg21	mkp1	n10	nfil3	pip92	rgs2	sil	tis11
GnRH	-0.345988	-4.05739	-6.50197	-3.45435	-0.28611	-2.01187	-2.77581	-1.45345	-5.04991	-3.07792	-7.24459	-4.59331	-2.09687	-2.55532	-10.4596	-6.10507	-6.55966	-4.39216	-4.85009	-1.43525
PD	-0.891378	-4.90553	-5.49329	-5.01882	-2.14751	-4.4555	-6.93078	-3.04174	-7.0636	-3.3389	-8.80463	-4.84573	-3.08167	-2.50515	-10.8221	-6.02616	-7.72245	-4.41435	-5.26055	-1.72421
SP	0.397601	-6.50007	-7.3509	-5.56122	0.0380295	-2.64363	-5.58874	-1.72477	-7.31572	-5.00687	-9.80258	-4.08647	-3.46053	-2.186	-10.3348	-5.71856	-8.22192	-3.16348	-5.48796	-1.17709
BIMI	-0.125213	-4.16643	-5.88249	-4.90316	-0.823987	-3.39804	-6.46766	-3.81518	-5.67213	-1.9092	-8.40351	-4.69368	-2.96728	-3.27456	-11.043	-5.88407	-6.97094	-5.32518	-5.03749	-2.6186
PP2	-0.834262	-4.60927	-6.57468	-4.57488	-0.62054	-2.94931	-5.43312	-2.21455	-6.06532	-3.04753	-8.3525	-5.47733	-2.86013	-2.66738	-10.111	-6.33106	-7.0267	-4.41404	-5.76125	-1.64973
AG1478	-0.775811	-4.50778	-5.59996	-4.49072	-0.607771	-2.38318	-4.65736	-1.78859	-5.95911	-1.97423	-8.78588	-5.41218	-2.49382	-2.73942	-10.3507	-6.43379	-7.84828	-5.02277	-4.20766	-1.70491
KN62	-0.759119	-4.48622	-7.13887	-5.59837	-0.402188	-2.03959	-5.95752	-1.73529	-6.88117	-3.2038	-10.3	-5.36219	-2.32674	-2.8033	-10.269	-7.7522	-7.48905	-5.05544	-5.03124	-1.66341
Standard Deviation of mean log activity
	cfos	cjun	dexras	dusp8	egr1	egr2	egr3	fosB	fra1	GIF	junB	klf4	lrg21	mkp1	n10	nfil3	pip92	rgs2	sil	tis11
GnRH	0.170986	0.194558	0.496769	0.441568	0.0653376	0.201795	0.52831	0.243263	0.713685	0.256948	0.627327	0.350668	0.245937	0.183355	0.453156	0.18898	0.520567	0.217878	0.128645	0.190586
PD	0.32482	0.330934	1.28243	0.551953	0.152594	0.623484	1.23494	0.266045	2.40873	1.17951	2.26977	1.27406	0.262144	0.339114	0.845702	0.569634	2.43334	0.648739	0.776687	0.527443
SP	0.33056	0.385137	0.468488	0.280421	0.175514	0.411057	0.56944	0.0486608	1.12989	1.06503	0.500047	0.290303	0.115099	0.294147	0.481239	0.359787	1.34301	0.267251	0.268998	0.324854
BIMI	0.737418	0.0798206	0.824017	0.155986	0.104177	0.176935	0.327212	0.179616	0.316671	0.549695	0.20302	0.0709399	0.112588	0.109943	0.348677	0.390483	0.229236	0.208334	0.704509	0.259042
PP2	0.222937	0.215063	0.531366	0.412685	0.188093	0.210672	0.438841	0.182766	0.62675	0.655019	1.14848	0.474986	0.214009	0.227516	0.427623	0.133239	1.10228	0.547518	0.507924	0.31265
AG1478	0.130472	0.166173	1.88311	0.225123	0.0786591	0.119058	0.588567	0.124784	1.1364	2.04041	1.27288	0.999329	0.132263	0.1284	0.343978	0.399477	1.10763	0.401918	1.57419	0.341623
KN62	0.126341	0.19126	0.775679	0.309598	0.111581	0.161153	0.313068	0.183518	0.775818	0.414897	0.762226	0.619818	0.145881	0.135667	0.337796	0.378643	0.889084	0.242476	0.307076	0.502946

## Sheet: Ex#5
Mean copy number in arbitrary units, assuming a constant ratio between each gene and rgs11
	cfos	cjun	CREM	dusp8	egr1	egr2	egr3	fosB	fra1	junB	klf4	lrg21	mkp1	n10	nfil3	pip92	tis11
GnRH	605.744	37.6815	2.42296	14.4756	278.876	98.241	22.6087	100.395	1.91856	0.169026	6.70863	57.0997	215.345	1.01576	8.75446	6.89033	115.735
PD	230.66	29.7022	1.56752	8.63374	59.6166	9.28107	10.3558	48.1875	0.778547	2.5763	19.1733	49.5504	238.413	0.429525	24.1513	13.1036	56.9967
SP	518.252	12.8435	8.52578	5.76809	353.605	42.7748	10.0639	99.088	0.736469	2.25029	24.9834	26	713.169	0.619275	27.9005	11.1763	93.6827
BIMI	327.036	24.441	2.67546	11.5523	155.963	17.7808	4.19321	9.75447	1.64115	0.36346	4.72735	21.2585	98.676	0.236674	6.7723	2.97967	51.66
PP2	440.931	32.2249	3.88997	15.6268	295.877	56.121	19.2123	93.0408	1.43678	0.120472	7.53527	49.8729	188.376	0.913943	12.4462	1.98039	116.377
AG1478	456.672	25.3327	3.19222	14.6626	221.699	60.1151	22.294	90.2218	4.53964	0.576572	4.95828	55.6771	167.252	0.494834	8.0843	3.94718	121.152
KN62	548.36	24.1428	4.00912	13.7429	252.846	73.3038	23.4173	86.3597	3.67082	0.320965	6.33954	60.0157	217.265	0.683331	10.5291	6.18101	119.348
Mean difference in Ct values between gene and rgs11 (mean log activity)
	cfos	cjun	CREM	dusp8	egr1	egr2	egr3	fosB	fra1	junB	klf4	lrg21	mkp1	n10	nfil3	pip92	tis11
GnRH	0.58641	-3.60229	-7.78014	-5.05029	-0.637485	-2.18063	-4.41595	-2.12854	-8.21303	-12.1058	-6.22974	-2.97527	-0.972248	-9.2335	-5.82184	-6.55085	-1.89216
PD	-0.842973	-4.58413	-8.44058	-5.84128	-2.9293	-5.77539	-6.6978	-3.39631	-9.69268	-11.021	-5.7352	-3.58568	-1.23176	-10.5515	-4.94812	-7.98656	-2.97679
SP	0.393007	-5.74066	-5.86537	-6.45049	-0.25034	-3.40258	-5.72295	-2.13997	-9.60361	-11.1368	-4.51904	-4.44557	-0.708663	-9.84446	-4.31753	-7.7551	-2.21547
BIMI	-0.32886	-4.26289	-7.69216	-5.45245	-1.4509	-4.84006	-7.03168	-5.81426	-8.672	-11.6288	-6.79427	-4.50295	-2.1489	-11.5947	-6.21203	-8.01293	-3.13522
PP2	0.143713	-3.83686	-7.06731	-4.9506	-0.462752	-3.01538	-4.63279	-2.23828	-8.57189	-12.3773	-6.06418	-3.1897	-1.15215	-9.35374	-5.29012	-8.17081	-1.89575
AG1478	0.187323	-4.20087	-7.38439	-5.03225	-0.92586	-2.93328	-4.42083	-2.27618	-6.88474	-10.0961	-6.69742	-3.0358	-1.33991	-10.3351	-5.94363	-7.30773	-1.82651
KN62	0.421334	-4.28293	-7.02579	-5.13548	-0.710236	-2.60748	-4.39406	-2.35512	-7.23077	-11.0777	-6.34094	-2.90054	-0.993127	-9.71188	-5.54873	-6.58732	-1.84738
Standard Deviation of mean log activity
	cfos	cjun	CREM	dusp8	egr1	egr2	egr3	fosB	fra1	junB	klf4	lrg21	mkp1	n10	nfil3	pip92	tis11
GnRH	0.394665	0.187011	0.221089	0.0975785	0.619325	0.400371	0.441702	0.314815	0.592089	1.10795	0.21619	0.235932	0.328387	0.723563	0.185311	1.18671	0.151215
PD	0.147496	1.5957	0.213801	0.168362	0.371809	0.455569	1.71596	0.746919	0.838781	3.09565	1.66933	1.06117	1.0896	0.718079	1.32723	2.736	0.227223
SP	0.0584398	1.16757	0.213274	0.112092	0.498379	0.0997588	0.772623	0.258543	0.316328	2.92646	0.914764	0.931185	1.9774	0.112963	0.866808	2.45088	0.176773
BIMI	0.280862	0.208355	0.534191	0.478799	0.259161	0.653959	0.626391	0.782905	1.04724	1.80327	0.413687	0.381728	0.265657	1.07468	0.180769	1.45148	0.282754
PP2	0.127713	0.152033	0.278067	0.262329	0.123721	0.323445	0.251628	0.270766	0.200823	0.414402	0.291955	0.294253	0.158341	0.630973	0.213969	0.594961	0.2598
AG1478	0.224561	0.123219	0.367569	0.119045	0.313407	0.465049	0.324522	0.206358	0.537339	0.738826	0.280932	0.389338	0.218929	0.81025	0.192969	1.1646	0.187647
KN62	0.440356	0.215525	0.311415	0.179691	0.218629	0.316212	0.539298	0.290914	0.594244	1.02033	0.364697	0.238059	0.460011	0.279135	0.250278	0.979559	0.171168

## Sheet: Ex#6
Mean copy number in arbitrary units, assuming a constant ratio between each gene and rgs11
	lrg21	cfos	cjun	CREM	dexras	dusp8	egr1	egr2	egr3	fosB	fra1	GIF	junB	klf4	mkp1	egr2	nfil3	pip92	rgs2	sil	tis11
GnRH	122.421	410.865	20.0438	3.61094	1.31947	8.21417	354.888	151.897	28.0915	180.861	1.9489	27.3868	0.15113	10.7516	128.329	0.32282	10.3988	1.93248	4.41076	9.45136	5.40851
PD	57.9692	269.714	13.787	2.799	4.03833	11.8631	94.0813	0.164135	4.80088	57.1936	2.41096	228.752	0.150492	9.53602	79.2272	0.164135	21.7129	0.94812	4.18373	34.4582	28.097
SP	32.3749	486.477	3.62914	13.1752	3.84345	9.23403	429.614	94.5701	16.308	150.035	2.8018	120.731	0.151784	24.2373	116.343	0.311009	26.5291	1.06311	17.5743	35.7328	15.5838
BIMI	46.3427	312.013	19.5759	2.87531	2.61508	23.1265	189.235	38.9281	4.07999	17.7049	1.89798	153.384	0.0838982	5.16121	55.8117	0.127696	9.05099	1.11983	4.82889	32.4947	43.2132
PP2	93.4765	366.379	22.3154	4.88086	2.75728	15.5303	283.536	104.885	19.1887	145.904	1.90581	173.939	0.169435	8.47315	120.281	0.330597	14.2247	1.63607	11.0347	27.5974	18.3842
AG1478	92.7652	386.971	17.023	5.46636	4.57028	18.3509	240.884	125.978	24.366	137.82	9.51376	76.3313	0.105542	8.15989	113.288	0.282338	17.4959	2.73726	5.63698	56.6721	16.8235
KN62	112.24	390.986	18.6184	5.94349	1.59342	9.9738	307.864	132.382	26.7346	163.396	2.12836	104.986	0.128109	11.465	113.435	0.372829	16.4935	1.57891	4.64259	67.1901	15.3336
Mean difference in Ct values between gene and rgs11 (mean log activity)
	lrg21	cfos	cjun	CREM	dexras	dusp8	egr1	egr2	egr3	fosB	fra1	GIF	junB	klf4	mkp1	egr2	nfil3	pip92	rgs2	sil	tis11
GnRH	-1.8039	0.026202	-4.55572	-7.19391	-8.75761	-5.96836	-0.185182	-1.4746	-4.0481	-1.21044	-8.13987	-4.17003	-12.0965	-5.51459	-1.73646	-10.8455	-5.56153	-8.14803	-6.98179	-5.72778	-6.56131
PD	-2.94366	-0.607234	-5.1226	-7.57573	-7.16311	-5.4063	-2.20773	-11.9022	-6.76977	-2.9788	-7.80626	-1.00817	-12.0046	-5.6904	-2.49833	-11.9022	-4.45122	-9.3378	-6.9985	-3.81276	-4.04937
SP	-3.83017	0.285817	-7.16219	-5.19893	-7.27362	-5.8747	0.0997132	-2.19552	-4.87667	-1.49327	-7.93634	-1.90753	-12.0324	-4.27072	-1.88033	-10.9558	-4.14345	-9.10311	-4.94043	-3.79167	-4.93844
BIMI	-3.27974	-0.380529	-4.58958	-7.51122	-7.79145	-4.36908	-1.14951	-3.54926	-6.97421	-4.74282	-8.29363	-1.72767	-12.9007	-6.61872	-2.99618	-12.2641	-5.76591	-8.99125	-7.17716	-3.9336	-3.386
PP2	-2.21828	-0.153468	-4.39219	-6.71619	-7.72953	-4.96794	-0.535134	-2.04359	-4.64148	-1.54509	-8.13961	-1.37987	-11.873	-5.86498	-1.82999	-10.8869	-5.07781	-8.45004	-5.7499	-4.10527	-4.68942
AG1478	-2.22596	-0.0943037	-4.80332	-6.56767	-6.86304	-4.70996	-0.80579	-1.81835	-4.2747	-1.62411	-5.94742	-2.89926	-12.7245	-5.93398	-1.94575	-11.0618	-4.796	-8.22029	-6.63611	-3.28787	-4.82197
KN62	-1.94573	-0.0558538	-4.66866	-6.44757	-8.40745	-7.15103	-0.405224	-1.70245	-4.14507	-1.36733	-8.00982	-2.0407	-12.5376	-5.45423	-1.93019	-10.6745	-4.86808	-8.47714	-6.87723	-2.73421	-4.968
Standard Deviation of mean log activity
	lrg21	cfos	cjun	CREM	dexras	dusp8	egr1	egr2	egr3	fosB	fra1	GIF	junB	klf4	mkp1	egr2	nfil3	pip92	rgs2	sil	tis11
GnRH	122.421	0.242157	0.1034	0.349293	0.511961	0.460091	0.109052	0.0854826	0.174821	0.107919	0.371776	0.570329	0.658494	0.230372	0.168045	0.224663	0.201444	0.376783	0.642747	0.337053	0.242157
PD	57.9692	0.167222	0.0516791	0.326235	0.859055	0.44082	0.156515	0.402812	0.398519	0.276338	0.329334	0.783025	0.209561	0.167463	0.372073	0.402812	0.269694	0.660299	0.487874	0.586284	0.193812
SP	32.3749	0.210145	0.193938	0.16858	0.922587	0.789926	0.180917	0.0908416	0.190932	0.0833098	1.21878	0.557449	0.44487	0.156502	0.0892817	0.496634	0.249708	0.535768	0.904723	0.660089	0.1028
BIMI	46.3427	0.0980977	0.0563812	0.138469	0.718296	0.347128	0.195762	0.146621	0.0415123	0.0697805	0.806113	1.01172	0.263589	0.095558	0.0562296	0.277769	0.120603	0.41742	1.45757	0.63013	0.0760518
PP2	93.4765	0.283671	0.0997058	0.235175	0.761475	0.317286	0.203615	0.169703	0.290007	0.202846	0.170821	0.65663	0.486522	0.0994031	0.0951391	0.567734	0.113297	0.590246	1.05704	0.362585	0.137737
AG1478	92.7652	0.378129	0.0878543	0.358759	0.498771	0.292728	0.345866	0.439432	0.257254	0.114895	1.02835	1.1283	0.984083	0.223284	0.303936	0.309253	0.373378	1.29649	0.753991	1.11333	0.101866
KN62	112.24	0.267951	0.115314	0.40401	0.121051	4.43044	0.158659	0.267515	0.319585	0.146156	0.429718	0.156422	1.24962	0.430319	0.217327	0.456564	0.252136	0.48069	0.644431	0.286504	0.169543
